# Supplementary material for: Oxygen surface groups of activated carbon steer the chemoselective hydrogenation of substituted nitroarenes over nickel nanoparticles
Source: Royal Society of Chemistry journal article supplement (doi:10.1039/c6cc08505a), 2017-01-01
Supplement: c6cc08505a1.pdf [file c6cc08505a1.pdf]

## Supporting Information for

# Oxygen Surface Groups of Activated Carbon Steer the Chemoselective Hydrogenation of Substituted Nitroarenes over Nickel Nanoparticles

Yujing Ren,<sup>a,b</sup> Haisheng Wei,<sup>a,b</sup> Guangzhao Yin,<sup>a,c</sup> Leilei Zhang,<sup>a</sup> Aiqin Wang,<sup>a,\*</sup> and  
Tao Zhang<sup>a,\*</sup>

<sup>a</sup> State Key Laboratory of Catalysis, iChEM (Collaborative Innovation Center of Chemistry for Energy Materials), Dalian Institute of Chemical Physics, Chinese Academy of Sciences, Dalian, 116023, China.

<sup>b</sup> University of Chinese Academy of Sciences, Beijing 100049, China.

<sup>c</sup> School of Chemical Engineering, Dalian University of Technology, Dalian, 116024, China.

Corresponding to

[aqwang@dicp.ac.cn](mailto:aqwang@dicp.ac.cn)

[taozhang@dicp.ac.cn](mailto:taozhang@dicp.ac.cn)

## Experimental details

### 1.1 Preparation of catalysts

The AC<sub>OX</sub> support was prepared by treating activated carbon (denoted as AC, Norit, S<sub>BET</sub> = 638 m<sup>2</sup>/g) with concentrated nitric acid solution (33 wt%) at 80 °C for 24 h. After that, the material was washed by deionized water several times until neutral filtrate was obtained, and then dried at 120 °C for 12h.

The Ni/AC<sub>OX</sub> catalyst was prepared by incipient wet impregnation of the AC<sub>OX</sub> support with an aqueous solution of nickel nitrate (0.2527 g nickel nitrate dissolved in 1.3 g deionized water was used for impregnating 1g AC<sub>OX</sub>), and then dried at room temperature overnight and at 120 °C for 5h. Before characterization and reactivity test, the Ni/AC<sub>OX</sub> catalyst was reduced in a tube-furnace reactor, which was ramped from 20 °C to 350 °C at a rate of 10 °C/min under 10%H<sub>2</sub>/He (20mL/min) and held at 350 °C for 30min. Then, H<sub>2</sub> was switched off and He was introduced continuously until the reactor was cooled down to room temperature. Finally 5%O<sub>2</sub>/He was switched into the reactor for 10 min to passivate the Ni catalyst.

Other supported Ni catalysts, including using different supports and different nickel precursors, were prepared with a similar procedure to the above Ni/AC<sub>OX</sub>.

### 1.2 Characterization methods

X-ray diffraction (XRD) patterns were recorded on a PANalytical X'pert diffractometer equipped with a Cu-K $\alpha$  radiation source with a scanning angle ( $2\theta$ ) of 10° to 80°, operated at 40 kV and 40 mA.

N<sub>2</sub> adsorption-desorption was performed on a Quadrasorb SI instrument. Before the measurement, the sample was pretreated at 120 °C for 2 h and at 250 °C for 3 h in vacuum to remove adsorbed hydrates and carbonates. The specific surface area was calculated using a Brunauer–Emmett–Teller (BET) method in the range of P/P<sub>0</sub> from 0.05 to 0.30.

Temperature-programmed desorption (TPD) was conducted on an Auto Chem II 2910 automatic catalyst characterization system equipped with a mass spectra detector. Firstly, a catalyst sample was loaded into a U-shape quartz reactor and pretreated at 150 °C in He for 0.5 h to remove adsorbed

hydrates and carbonates. Then, after cooling down to room temperature, the sample was heated to 900 °C in He at a ramping rate of 10 °C min<sup>-1</sup>.

Transmission electron microscopy (TEM) images were obtained on a JEOL JEM-2100F microscope operated at 200 kV. Before microscopy examination, the sample was ultrasonically dispersed in ethanol for 5-10 min and then a drop of the solution was put on a copper TEM grid coated with a thin holey carbon film.

X-ray photoelectron spectroscopy (XPS) spectra were obtained on a Thermo ESCALAB 250 X-ray photoelectron spectrometer equipped with Al K $\alpha$  excitation source and with C as internal standard (C1s = 284.6 eV).

Ni leaching in solution was determined by inductively coupled plasma spectroscopy (ICP-AES) on an IRIS Intrepid II XSP instrument (Thermo Electron Corporation).

### **1.3 Reaction tests**

The chemoselective hydrogenation of nitroarenes was performed in an autoclave equipped with a temperature and pressure control. A mixture solution in a total volume of 5 ml, including nitroarene substrate as reactant, toluene as solvent and O-xylene as internal standard, was put into the autoclave. Then, the reactor was sealed and purged with 10 bar of hydrogen for five times. Afterwards, the autoclave was pressurized with H<sub>2</sub> up to 3 bar (for hydrogenation of nitroarenes to anilines) or 20 bar (for hydrogenation of  $\alpha,\beta$ -unsaturated nitroarenes to oximes) and heated to the desired reaction temperature in a water bath, and the reaction was initiated with stirring using a magnetic stirring bar. After finishing the reaction, the product was analyzed by a gas chromatograph equipped with a FID detector.

Pretreatment procedure: After reduction at 350 °C, the powder catalyst, 5 ml toluene and magnetic bar were putted into the autoclave. And then the autoclave was charged with 1 MPa hydrogen and sealed. Finally the reactor was heated at 40 °C for 1 h in the wash bath to remove the surface O of the catalyst. Subsequently, toluene was poured out and a total volume of 5 ml solution including 3-nitrostyrene, toluene and internal standard O-xylene, was put into the autoclave to start the reaction test.

**Table S1.** Chemoselective hydrogenation of 3-nitrostyrene over different supported Ni catalysts.

| Catalyst                          | Time (min) | Con. (%) | Sel. (%) |
|-----------------------------------|------------|----------|----------|
| Ni/AC <sub>OX</sub>               | 190        | 97.9     | 97.1     |
| Ni/AC                             | 190        | 27.4     | 95.2     |
| Ni/SiO <sub>2</sub>               | 190        | 0.0      | 0.0      |
| Ni/Al <sub>2</sub> O <sub>3</sub> | 190        | 0.0      | 0.0      |
| Raney Ni <sup>[a]</sup>           | 155        | 76.8     | 62.5     |
| AC                                | 360        | -        | -        |

Reaction conditions: T=40 °C, P=3 bar, 0.1g catalyst; 5 ml reaction mixture: 0.5 mmol 3-nitrostyrene, toluene as solvent, and o-xylene as internal standard. [a] 50 °C, 15 mg Raney Ni.

**Table S2.** Chemoselective hydrogenation of 3-nitrostyrene over 5%Ni/AC<sub>OX</sub> catalysts prepared by different Ni precursors.

| Catalyst            | Ni Precursor                         | Time (min) | Con. (%) | Sel. (%) |
|---------------------|--------------------------------------|------------|----------|----------|
| Ni/AC <sub>OX</sub> | Ni(NO <sub>3</sub> ) <sub>2</sub>    | 190        | 97.9     | 97.1     |
| Ni/AC <sub>OX</sub> | Ni(CH <sub>3</sub> COO) <sub>2</sub> | 190        | 62.6     | 99.7     |
| Ni/AC <sub>OX</sub> | NiSO <sub>4</sub>                    | 190        | 0.0      | 0.0      |
| Ni/AC <sub>OX</sub> | NiCl <sub>2</sub>                    | 190        | 3.3      | 90.0     |

Reaction conditions: T = 40 °C, P = 3 bar, 0.1 g catalyst; 5 ml reaction mixture: 0.5 mmol 3-nitrostyrene, toluene as solvent, and o-xylene as internal standard.

**Table S3.** XRF analysis of 5%Ni/AC<sub>OX</sub> catalyst prepared by NiSO<sub>4</sub> precursor.

| Catalyst            | Ni Precursor      | Element and content (wt%) |     |     |     |     |
|---------------------|-------------------|---------------------------|-----|-----|-----|-----|
|                     |                   | C                         | Na  | Ni  | Si  | S   |
| Ni/AC <sub>OX</sub> | NiSO <sub>4</sub> | 91.7                      | 0.4 | 5.2 | 0.6 | 2.0 |

**Table S4.** Recycling results for chemoselective hydrogenation of 3-nitrostyrene over 5% Ni/AC<sub>OX</sub> catalyst.

| Catalyst            | Recycling time | Time (min) | Con. (%) | Sel. (%) |
|---------------------|----------------|------------|----------|----------|
| Ni/AC <sub>OX</sub> | 0              | 190        | 97.9     | 97.1     |
| Ni/AC <sub>OX</sub> | 1              | 100        | 94.7     | 94.9     |
| Ni/AC <sub>OX</sub> | 2              | 195        | 92.4     | 95.4     |
| Ni/AC <sub>OX</sub> | 3              | 420        | 85.6     | 97.6     |

Reaction conditions: T = 40 °C, P = 3 bar, 0.1 g catalyst; 5 ml reaction mixture: 0.5 mmol 3-nitrostyrene, toluene as solvent, and o-xylene as internal standard.

**Table S5.** 3-nitrostyrene adsorption on Ni/AC<sub>OX</sub> and Ni/AC catalysts.

| Catalyst            | Adsorption amount ( $\mu\text{mol/g}$ ) |            |
|---------------------|-----------------------------------------|------------|
|                     | Before wash                             | After wash |
| Ni/AC               | 410                                     | 185        |
| Ni/AC <sub>OX</sub> | 470                                     | 215        |

**Table S6.** Control experiments with styrene and nitrobenzene as the substrates over Ni/AC<sub>OX</sub> catalyst.

| Condition                 | Feeding (mmol) |              | TOF(mmol converted $\text{h}^{-1}\text{mol Ni}^{-1}$ ) |              |
|---------------------------|----------------|--------------|--------------------------------------------------------|--------------|
|                           | Styrene        | Nitrobenzene | Styrene                                                | Nitrobenzene |
| Non-competitive condition | 0              | 0.5          | 0                                                      | 827          |
|                           | 0.5            | 0            | 3398                                                   | 0            |
| Competitive condition     | 0.25           | 0.25         | 101                                                    | 1382         |

Reaction condition: T = 40 °C, P = 3 bar, 5 ml toluene, and mesitylene was used as internal standard.

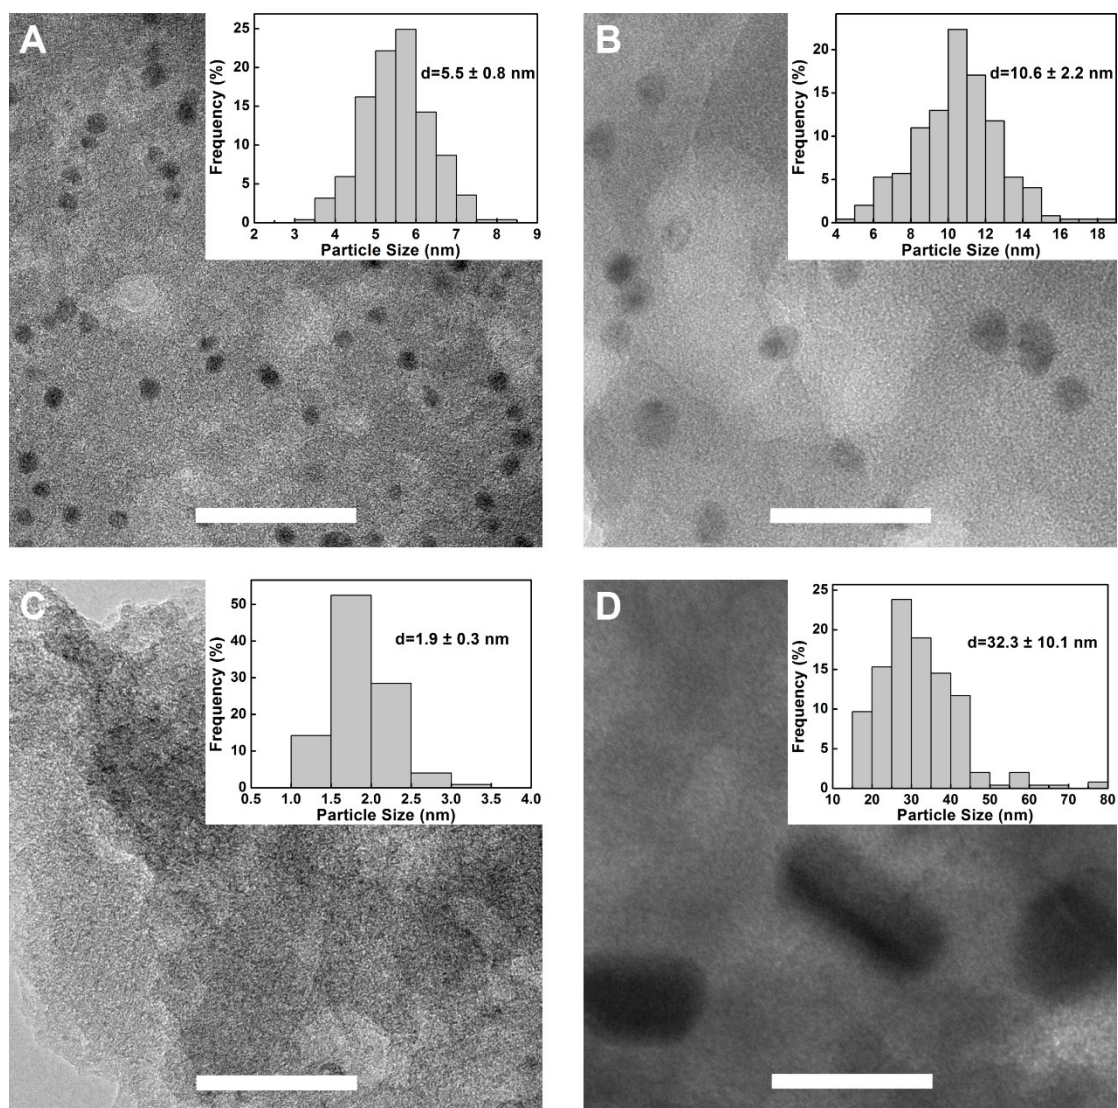

**Figure S1.** HRTEM images and size distributions of Ni/AC<sub>Ox</sub> catalysts which were prepared with different Ni precursors. (A): Ni(NO<sub>3</sub>)<sub>2</sub>; (B): Ni(CH<sub>3</sub>COO)<sub>2</sub>; (C) NiSO<sub>4</sub> and (D) NiCl<sub>2</sub>. Scale bar, 50 nm.

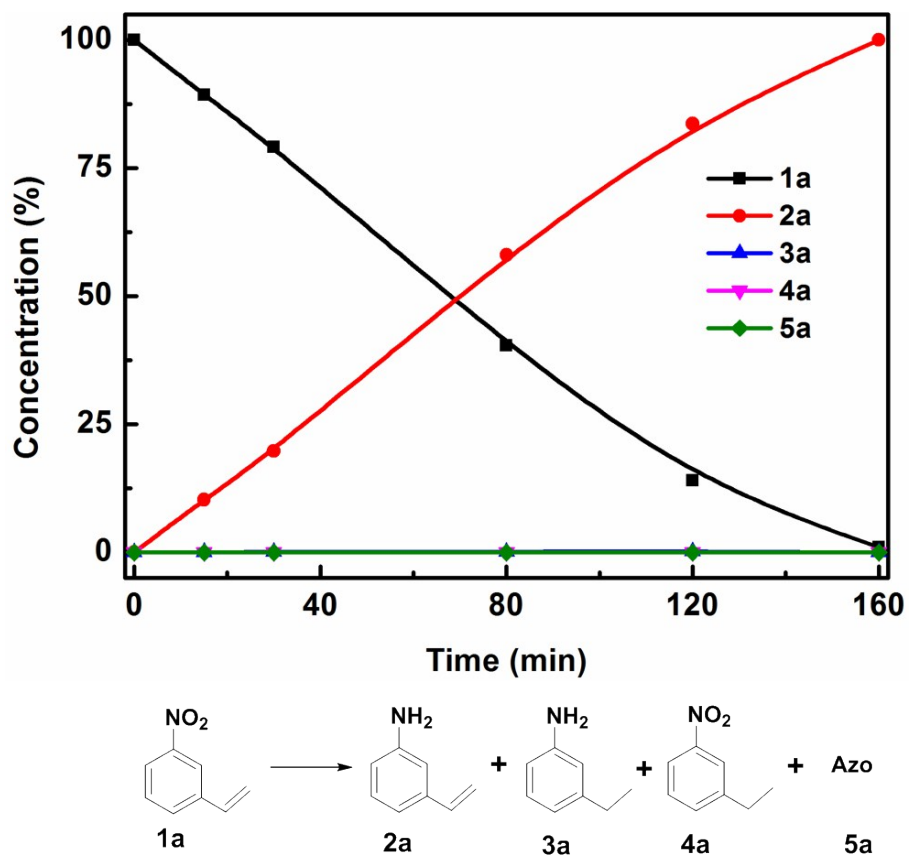

**Figure S2.** Kinetic curve for the 3-nitrostyrene hydrogenation over Ni/ACOX catalyst. Prior to reaction, the catalyst was pre-reduced with 1MPa H<sub>2</sub> in toluene at 40 °C for 1h. Reaction conditions: T = 40 °C, P = 3 bar, 0.1 g catalyst; 5 ml reaction mixture: 0.5 mmol 3-nitrostyrene, toluene as solvent, and o-xylene as internal standard.

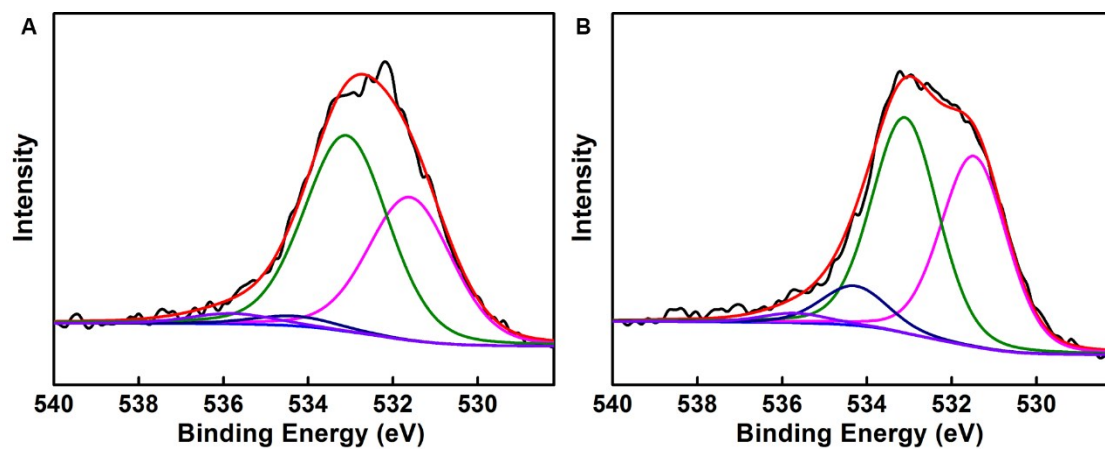

**Figure S3.** O 1s XPS spectra of (A) AC and (B) AC<sub>ox</sub> supports.



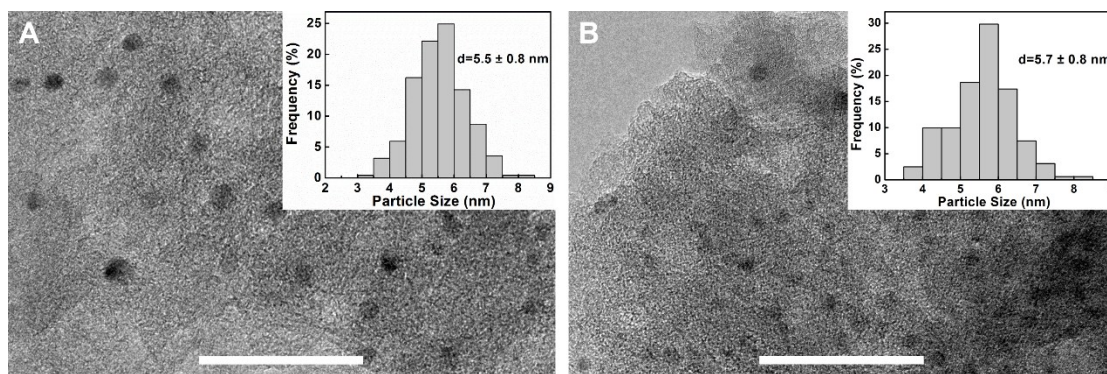

**Figure S4.** HRTEM images and size distributions of (A) fresh and (B) used Ni/AC<sub>OX</sub> catalysts. Scale bar, 50 nm.

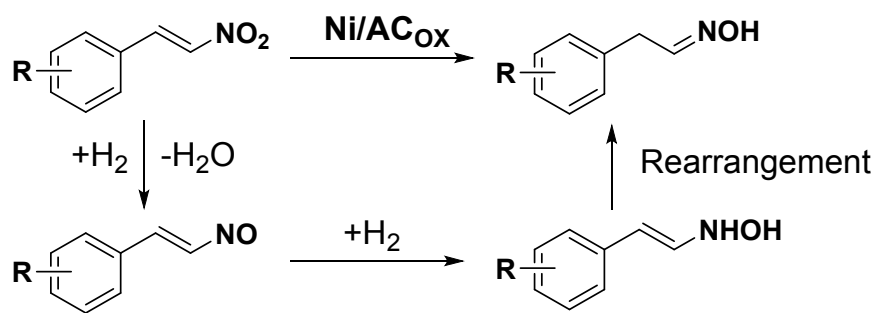

**Scheme S1.** Proposed reaction mechanism for hydrogenation of  $\alpha,\beta$ -unsaturated nitroarenes to produce oximes.
